# Supplementary material for: Primary hip or knee arthroplasty in the setting of chronic suppressive antibiotics for prior periprosthetic joint infection: a scoping review
Source: Copernicus journal article supplement (doi:10.5194/jbji-11-331-2026), 2026-06-05
Supplement: Supplementary file [file jbji-11-331-2026-supplement.pdf]

Supplement of J. Bone Joint Infect., 11, 331–336, 2026  
<https://doi.org/10.5194/jbji-11-331-2026-supplement>  
© Author(s) 2026. CC BY 4.0 License.

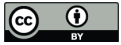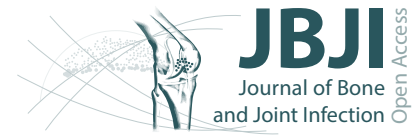

*Supplement of*

## **Primary hip or knee arthroplasty in the setting of chronic suppressive antibiotics for prior periprosthetic joint infection: a scoping review**

**Vincent K. Melemai et al.**

*Correspondence to:* Matthew J. Dietz ([mdietz@hsc.wvu.edu](mailto:mdietz@hsc.wvu.edu))

The copyright of individual parts of the supplement might differ from the article licence.

**Table S1****Table S1.** Additional study characteristics

| Author(s)              | Study Group                                                                                                                                             | Control Group                                                                                                                              | Follow-Up Duration                    | Time from PJI to New Primary                |
|------------------------|---------------------------------------------------------------------------------------------------------------------------------------------------------|--------------------------------------------------------------------------------------------------------------------------------------------|---------------------------------------|---------------------------------------------|
| Chalmers et al. (2019) | History of: PJI in contralateral TKA or any THA; surgical treatment of PJI with component exchange; and receiving primary TKA                           | Matched for: age, sex, BMI, and date of index primary TKA                                                                                  | 6 years (mean) (range: 2-16 years)    | 8 years (mean) (range: 4 months - 28 years) |
| Chalmers et al. (2020) | History of: PJI in contralateral THA or any TKA; surgical treatment of PJI with component exchange or resection arthroplasty; and receiving primary THA | Matched for: age, sex, BMI, and surgical year                                                                                              | 6 years (mean) (range: 2-16 years)    | 4 years (mean) (range: 3 months - 18 years) |
| Humphrey et al. (2022) | History of: long-term oral (>6 months duration) SAT; maximum of 30 days SAT prior to TJA; and receiving new primary TJA                                 | Matched for: age, sex, BMI, joint of primary THA or TKA, type 2 diabetes mellitus history, smoking history, and indication for primary TJA | 4.10 years (mean) ( $\pm$ 3.42 years) | Not specified within study                  |
